# Supplementary material for: Switching extensional and contractional tectonics in the West Kunlun Mountains during the Jurassic period: responses to the Neo-Tethyan geodynamics along the Eurasian margin
Source: Copernicus journal article supplement (doi:10.5194/se-16-155-2025), 2025-02-21
Supplement: Supplementary file 1 [file se-16-155-2025-supplement.zip]

## Sheet: JPG
Table S4: Jurassic conglomerate clast lithologies.
