# Supplementary material for: Switching extensional and contractional tectonics in the West Kunlun Mountains during the Jurassic period: responses to the Neo-Tethyan geodynamics along the Eurasian margin
Source: Copernicus journal article supplement (doi:10.5194/se-16-155-2025), 2025-02-21
Supplement: Supplementary file 2 [file se-16-155-2025-supplement.zip]

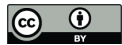

## *Supplement of*

# **Switching extensional and contractional tectonics in the West Kunlun Mountains during the Jurassic period: responses to the Neo-Tethyan geodynamics along the Eurasian margin**

**Hong-Xiang Wu et al.**

*Correspondence to:* Han-Lin Chen (hlchen@zju.edu.cn)

- se-16-155-2025-supplement-title-page.pdf
- S1. Analytical Methodology.docx
- Supplementary Fig. S1.pdf
- Table S1 Zircon U-Pb data.xlsx
- Table S2 Trace element of zircon.xlsx
- Table S3 Whole rock geochemical results.xlsx
- Table S4 Jurassic conglomerate clast lithologies.xlsx

The copyright of individual parts of the supplement might differ from the article licence.
