# Supplementary material for: Switching extensional and contractional tectonics in the West Kunlun Mountains during the Jurassic period: responses to the Neo-Tethyan geodynamics along the Eurasian margin
Source: Copernicus journal article supplement (doi:10.5194/se-16-155-2025), 2025-02-21
Supplement: Supplementary file 3 [file Table S1 Zircon U-Pb data.xlsx]

## Sheet: Zircon U-Pb data of basalt
Table S1: Zircon U-Pb data of Jurassic basalt and sedimentary rocks.
spots	Isotopic ratios						Isotopic Ages						Th	U	Th/U	Concordance (%)	Interpretation	Morphology	Oscillatory zoning	Type
	207Pb/235U ratio	2 σ	206Pb/238U ratio	2 σ	207Pb/206Pb ratio	2 σ	207Pb/235U Ma	2 σ	206Pb/238U Ma	2 σ	207Pb/206Pb Ma	2 σ	ppm	ppm
Sample name: AYBL09			Basalts			GPS:	37°46'27.72"	76°24'14.19"
AYBL09#01	0.527	0.045	0.0648	0.0025	0.0608	0.0059	426	30	405	15	530	190	74	169	0.43787	0.948148	inherited	sub-euhedral	inconspicuous	1
AYBL09#02	0.512	0.034	0.0702	0.002	0.0524	0.0033	416	23	437	12	270	140	155	265	0.584906	0.951945	inherited	euhedral	clear	1
AYBL09#03	0.523	0.036	0.0691	0.0015	0.0557	0.0038	427	25	430.7	8.9	360	140	54.1	143	0.378322	0.991409	inherited	euhedral	clear	1
AYBL09#04	0.202	0.031	0.0273	0.0012	0.0551	0.009	183	27	173.7	7.4	230	340	16.8	91	0.184615	0.946459	crystallization	subrounded	unclear	2
AYBL09#05	0.194	0.021	0.0295	0.0011	0.0484	0.0059	178	18	187.1	7.1	30	230	62.1	125	0.4968	0.951363	crystallization	subrounded	unclear	2
AYBL09#06	0.186	0.021	0.0277	0.00093	0.0492	0.0058	170	18	177.3	6.2	90	230	81	153	0.529412	0.958827	crystallization	subrounded	unclear	2
AYBL09#07	1.47	0.075	0.1519	0.004	0.0704	0.0036	911	31	911	22	880	110	94.1	145	0.648966	1	inherited	sub-euhedral	clear	1
AYBL09#08	0.193	0.024	0.0286	0.0014	0.0503	0.0073	176	20	181.6	8.6	80	250	10.5	101	0.10396	0.969163	crystallization	subrounded	unclear	2
AYBL09#09	0.193	0.038	0.028	0.0016	0.0468	0.0087	178	33	178	10	40	350	21.6	66	0.327273	1	crystallization	subrounded	unclear	2
AYBL09#10	0.179	0.019	0.02706	0.00086	0.0494	0.0058	169	17	172.1	5.4	80	220	98	313	0.313099	0.981987	crystallization	subrounded	unclear	2
AYBL09#11	0.201	0.04	0.0287	0.0017	0.0501	0.0097	190	37	182	11	110	360	8.5	80	0.10625	0.956044	crystallization	subrounded	unclear	2
AYBL09#12	0.188	0.031	0.0273	0.0013	0.0511	0.0086	170	26	173.8	8.3	70	310	2.94	77	0.0381818	0.978136	crystallization	subrounded	inconspicuous	2
AYBL09#13	0.201	0.023	0.02856	0.00096	0.0498	0.0055	183	19	181.5	6	170	240	390	257	1.51751	0.991736	crystallization	subrounded	unclear	2
AYBL09#14	0.201	0.013	0.02864	0.00083	0.052	0.0037	188	12	182	5.2	240	150	264	439	0.601367	0.967033	crystallization	subrounded	unclear	2
AYBL09#15	0.205	0.02	0.02845	0.00088	0.0526	0.0054	188	17	180.8	5.5	230	210	107	237	0.451477	0.960177	crystallization	subrounded	inconspicuous	2
AYBL09#16	0.206	0.035	0.0281	0.0013	0.058	0.011	184	30	178.5	8	200	350	3.6	71.1	0.0506329	0.969188	crystallization	subrounded	unclear	2
AYBL09#17	0.525	0.03	0.0684	0.0018	0.0552	0.0028	425	20	426	11	380	110	138	199	0.693467	0.997653	inherited	sub-euhedral	inconspicuous	1
AYBL09#18	0.213	0.028	0.0286	0.0011	0.0556	0.0077	192	23	181.6	7	240	260	94	130	0.723077	0.942731	crystallization	subrounded	unclear	2
AYBL09#19	0.215	0.021	0.0304	0.0011	0.0516	0.005	199	18	192.7	7	210	200	124	228	0.54386	0.967307	crystallization	subrounded	unclear	2
AYBL09#20	0.185	0.023	0.0273	0.0013	0.0525	0.0072	170	20	173.4	7.9	160	260	11.3	151	0.0748344	0.980392	crystallization	subrounded	unclear	2
AYBL09#21	0.205	0.032	0.0283	0.0014	0.0554	0.0095	185	26	179.7	8.7	150	290	16.2	103.2	0.156977	0.970506	crystallization	subrounded	unclear	2
AYBL09#22	0.202	0.012	0.02817	0.00089	0.052	0.0034	186	10	179	5.6	240	140	402	341	1.17889	0.960894	crystallization	subrounded	unclear	2
AYBL09#23	2	0.15	0.1489	0.0051	0.0949	0.0057	1095	51	894	28	1480	120	159	114	1.39474	0.775168	Pb loss	euhedral	clear	1
AYBL09#24	1.206	0.036	0.1316	0.003	0.0663	0.0017	801	16	797	17	801	55	912	635	1.43622	0.994981	inherited	euhedral	clear	1
AYBL09#25	0.205	0.031	0.0288	0.0013	0.0519	0.0078	185	26	183.2	8.3	150	290	3.02	73.5	0.0410884	0.990175	crystallization	subrounded	unclear	2
AYBL09#26	0.2	0.032	0.0282	0.0013	0.0528	0.009	181	26	179.1	8.3	140	310	17.4	88	0.197727	0.989391	crystallization	subrounded	unclear	2
AYBL09#27	0.206	0.031	0.0281	0.001	0.0534	0.0084	186	26	178.8	6.6	130	300	20	113	0.176991	0.959732	crystallization	subrounded	inconspicuous	2
AYBL09#28	0.193	0.013	0.02689	0.00067	0.0512	0.0033	178	11	171	4.2	230	150	651	746	0.872654	0.959064	crystallization	sub-euhedral	inconspicuous	2
AYBL09#29	1.294	0.074	0.1088	0.0058	0.0879	0.0062	835	32	664	34	1350	120	154	205	0.75122	0.74247	Pb loss	sub-euhedral	clear	1
AYBL09#30	0.196	0.02	0.02688	0.00088	0.0524	0.0053	183	19	170.9	5.5	280	230	204	228	0.894737	0.929198	crystallization	subrounded	unclear	2
AYBL09#31	0.257	0.028	0.0351	0.0017	0.0526	0.0057	228	23	222	10	240	230	159	176	0.903409	0.972973	inherited	subrounded	inconspicuous	2
AYBL09#32	1.432	0.042	0.1501	0.0026	0.069	0.0019	900	18	901	15	882	57	286	328	0.871951	0.99889	inherited	sub-euhedral	clear	1
AYBL09#33	0.238	0.024	0.0264	0.0012	0.0661	0.0071	214	20	167.9	7.7	620	220	56	131	0.427481	0.725432	Pb loss	subrounded	unclear	2
AYBL09#34	1.28	0.037	0.1407	0.0026	0.0655	0.0019	835	17	848	15	783	65	135	352	0.383523	0.98467	inherited	sub-euhedral	clear	1
AYBL09#35	0.203	0.029	0.0285	0.0011	0.051	0.0074	183	24	181	7	160	290	68	118	0.576271	0.98895	crystallization	subrounded	unclear	2
AYBL09#36	0.217	0.031	0.0287	0.0012	0.0557	0.0086	194	26	182.2	7.5	200	280	6.6	76.7	0.0860495	0.935236	crystallization	subrounded	unclear	2

## Sheet: Detrital zircon U-Pb data
Table S1: Zircon U-Pb data of Jurassic basalt and sedimentary rocks.
spots	Isotopic ratios						Isotopic Ages						Th/U	Concordance (%)	Interpreted age
	207Pb/235U ratio	2 σ	206Pb/238U ratio	2 σ	207Pb/206Pb ratio	2 σ	207Pb/235U Ma	2 σ	206Pb/238U Ma	2 σ	207Pb/206Pb Ma	2 σ			Age (Ma)	1σ
Sample name: AYBL13			Sandstone			GPS:	37°46'52.06"	76°25'21.49"
AYBL13#01	1.464	0.042	0.1531	0.0031	0.0689	0.0018	914	17	918	17	881	53	0.237197	0.995643	918	8.5
AYBL13#02	1.471	0.044	0.1531	0.0026	0.0688	0.0021	916	18	918	15	886	60	0.510582	0.997821	918	7.5
AYBL13#03	10.78	0.24	0.4512	0.0088	0.1703	0.0035	2501	21	2399	39	2554	35	0.870968	0.957482	2554	17.5
AYBL13#04	0.57	0.052	0.0746	0.0027	0.0552	0.005	450	34	463	16	320	190	0.613037	0.971922	463	8
AYBL13#05	0.535	0.019	0.0703	0.0015	0.0546	0.0019	434	12	437.8	8.8	386	79	0.624288	0.99132	437.8	4.4
AYBL13#06	1.315	0.028	0.1398	0.0021	0.0671	0.0012	851	13	843	12	840	39	0.797671	0.99051	843	6
AYBL13#07	1.379	0.036	0.1449	0.0029	0.0682	0.0018	878	16	872	16	859	55	0.13949	0.993119	872	8
AYBL13#08	5.09	0.17	0.3241	0.0058	0.1122	0.0033	1829	27	1809	28	1820	53	0.517969	0.988944	1820	26.5
AYBL13#09	1.56	0.054	0.1567	0.0026	0.0712	0.002	951	22	938	15	946	59	0.121495	0.986141	938	7.5
AYBL13#10	0.563	0.035	0.0729	0.0016	0.0554	0.0036	450	23	453.7	9.8	360	140	0.775862	0.991845	453.7	4.9
AYBL13#100	1.3	0.14	0.1371	0.0051	0.0718	0.0082	812	66	827	29	740	250	1.18182	0.981862	827	14.5
AYBL13#101	1.293	0.075	0.1444	0.0043	0.0671	0.0042	837	33	869	24	790	140	0.631818	0.963176	869	12
AYBL13#11	0.572	0.029	0.0731	0.0016	0.056	0.0029	456	19	454.8	9.8	400	110	0.876221	0.997361	454.8	4.9
AYBL13#12	2.28	0.11	0.2013	0.0051	0.0808	0.0033	1199	33	1181	28	1184	82	0.568376	0.984759	1181	14
AYBL13#13	2.746	0.086	0.2299	0.0034	0.0855	0.0019	1338	23	1333	18	1318	43	0.465823	0.996249	1333	9
AYBL13#14	10.54	0.27	0.4655	0.0095	0.1611	0.0033	2479	24	2462	42	2461	34	1.39918	0.993095	2461	17
AYBL13#15	10.43	0.21	0.4614	0.0089	0.1624	0.0036	2477	21	2453	42	2474	37	0.483978	0.990216	2474	18.5
AYBL13#16	9.81	0.26	0.433	0.01	0.1612	0.0026	2419	23	2315	47	2464	28	0.601476	0.955076	2464	14
AYBL13#17	1.681	0.033	0.1634	0.0024	0.07313	0.00098	1000	13	975	14	1013	27	0.0172078	0.974359	975	7
AYBL13#18	1.607	0.032	0.1611	0.0022	0.071	0.0013	972	12	963	12	950	38	0.00867187	0.990654	963	6
AYBL13#19	1.287	0.084	0.1345	0.0057	0.069	0.0044	829	38	812	33	810	140	1.35897	0.979064	812	16.5
AYBL13#20	0.56	0.026	0.0732	0.0013	0.0546	0.0024	449	17	455.2	7.6	359	98	0.894737	0.98638	455.2	3.8
AYBL13#21	1.396	0.036	0.1464	0.002	0.068	0.0015	886	15	881	11	856	46	0.0910334	0.994325	881	5.5
AYBL13#22	1.563	0.033	0.1397	0.0023	0.0796	0.0016	954	13	843	13	1180	40	0.544954	0.868327
AYBL13#23	0.549	0.025	0.071	0.0016	0.0554	0.0024	442	16	442	9.3	387	97	0.758007	1	442	4.65
AYBL13#24	0.593	0.032	0.0734	0.0019	0.058	0.0027	470	20	457	12	510	100	0.625316	0.971554	457	6
AYBL13#25	0.573	0.019	0.0733	0.0011	0.0562	0.0017	459	12	456.2	6.7	453	66	0.545069	0.993862	456.2	3.35
AYBL13#26	1.646	0.068	0.1645	0.0034	0.0727	0.0027	988	25	981	19	977	78	1.20419	0.992864	981	9.5
AYBL13#27	1.697	0.086	0.1648	0.004	0.0743	0.0036	1006	31	983	22	1023	96	1.54557	0.976602	983	11
AYBL13#28	0.551	0.038	0.0728	0.002	0.0557	0.004	441	25	453	12	350	150	0.74	0.97351	453	6
AYBL13#29	0.564	0.04	0.0733	0.0018	0.0561	0.0042	454	24	456	11	400	150	0.575325	0.995614	456	5.5
AYBL13#30	0.506	0.025	0.0688	0.0015	0.0542	0.0028	414	17	428.8	9.3	340	110	0.722628	0.965485	428.8	4.65
AYBL13#31	1.242	0.082	0.1326	0.004	0.0681	0.0043	821	34	802	23	850	120	0.662931	0.976309	802	11.5
AYBL13#32	1.569	0.07	0.1628	0.0041	0.0706	0.0033	958	29	972	22	902	96	0.457143	0.985597	972	11
AYBL13#33	11.04	0.29	0.485	0.01	0.1656	0.0033	2527	23	2545	44	2507	34	0.864964	0.992927	2507	17
AYBL13#34	1.235	0.048	0.1343	0.0033	0.0669	0.0026	813	22	812	19	822	76	0.710526	0.998768	812	9.5
AYBL13#35	0.631	0.026	0.0722	0.0011	0.0635	0.0026	495	16	449.3	6.7	687	87	0.432133	0.898286	449.3	3.35
AYBL13#36	0.57	0.023	0.0724	0.0019	0.0571	0.002	457	15	451	11	480	76	0.376168	0.986696	451	5.5
AYBL13#37	0.611	0.041	0.0755	0.0017	0.0588	0.0039	479	26	469	10	480	140	0.628272	0.978678	469	5
AYBL13#38	0.612	0.045	0.079	0.0027	0.057	0.0044	479	28	490	16	390	160	0.721698	0.977551	490	8
AYBL13#39	0.551	0.031	0.0718	0.0016	0.056	0.0032	442	20	447	9.3	400	120	0.563077	0.988814	447	4.65
AYBL13#40	3.88	0.17	0.2874	0.007	0.0986	0.0043	1600	36	1627	35	1580	79	0.917759	0.983405	1580	39.5
AYBL13#41	0.83	0.039	0.0949	0.0029	0.0635	0.0022	610	22	584	17	699	74	0.421751	0.955479	584	8.5
AYBL13#42	0.556	0.025	0.0711	0.0016	0.0569	0.0023	447	16	442.5	9.6	452	88	0.612613	0.989831	442.5	4.8
AYBL13#43	1.945	0.08	0.1866	0.0041	0.0758	0.0032	1091	28	1102	23	1068	84	1.16788	0.990018	1102	11.5
AYBL13#44	3.94	0.11	0.2845	0.0056	0.1007	0.0026	1617	23	1613	28	1633	52	0.740611	0.99752	1633	26
AYBL13#45	3.97	0.17	0.286	0.0052	0.1014	0.0038	1620	34	1621	26	1640	66	1.62069	0.999383	1640	33
AYBL13#46	4.72	0.17	0.3212	0.0074	0.107	0.0033	1763	31	1802	33	1732	57	0.646429	0.978357	1732	28.5
AYBL13#47	1.516	0.058	0.1598	0.0043	0.069	0.0023	933	23	955	24	874	68	0.612903	0.976963	955	12
AYBL13#48	4.05	0.099	0.2965	0.0061	0.0991	0.0021	1641	20	1673	30	1599	38	0.609319	0.980873	1599	19
AYBL13#49	2.231	0.061	0.2007	0.0034	0.0796	0.0015	1188	19	1179	18	1188	41	0.840108	0.992366	1179	9
AYBL13#50	2.817	0.077	0.2367	0.0041	0.0862	0.0021	1357	20	1369	21	1330	46	0.426829	0.991234	1369	10.5
AYBL13#51	1.581	0.025	0.1618	0.0022	0.0707	0.0012	961.8	9.7	966	12	941	34	0.267682	0.995652	966	6
AYBL13#52	1.634	0.052	0.1653	0.0033	0.0716	0.0022	980	20	986	18	952	65	0.498339	0.993915	986	9
AYBL13#53	0.56	0.019	0.0723	0.0013	0.0562	0.0018	451	12	450.2	7.9	441	72	0.666667	0.998223	450.2	3.95
AYBL13#54	1.67	0.054	0.1686	0.0027	0.0716	0.0023	994	20	1004	15	965	64	0.686869	0.99004	1004	7.5
AYBL13#55	8.68	0.19	0.4292	0.0069	0.1463	0.0028	2303	20	2301	31	2297	33	0.461538	0.999131	2297	16.5
AYBL13#56	2.106	0.06	0.1968	0.0034	0.077	0.0019	1148	20	1157	18	1120	45	0.750973	0.992221	1157	9
AYBL13#57	1.068	0.057	0.1231	0.0032	0.0628	0.0035	737	26	748	18	640	120	2.61184	0.985294	748	9
AYBL13#58	1.172	0.075	0.1263	0.0042	0.0674	0.0043	778	36	766	24	760	140	1.74204	0.984334	766	12
AYBL13#59	3.841	0.082	0.2853	0.0053	0.0976	0.0018	1602	18	1617	27	1571	35	0.764881	0.990724	1571	17.5
AYBL13#60	4.73	0.14	0.3177	0.0079	0.1078	0.0033	1767	26	1777	39	1744	59	0.64	0.994373	1744	29.5
AYBL13#61	0.559	0.02	0.0728	0.0016	0.0555	0.0021	450	13	452.7	9.8	404	83	0.527119	0.994036	452.7	4.9
AYBL13#62	3.57	0.12	0.2697	0.0061	0.0957	0.0027	1539	26	1538	31	1528	52	1.14286	0.99935	1528	26
AYBL13#63	1.941	0.05	0.186	0.0033	0.0753	0.0018	1093	17	1099	18	1065	50	0.572414	0.99454	1099	9
AYBL13#64	0.586	0.035	0.076	0.0022	0.0551	0.0031	464	23	472	13	380	120	0.499379	0.983051	472	6.5
AYBL13#65	1.453	0.057	0.1545	0.0029	0.068	0.0022	908	23	926	16	852	66	0.470588	0.980562	926	8
AYBL13#66	3.208	0.072	0.2547	0.0039	0.091	0.0018	1457	17	1462	20	1437	39	0.482505	0.99658	1462	10
AYBL13#67	1.192	0.039	0.1333	0.002	0.0647	0.0021	795	18	806	12	739	71	2.35316	0.986352	806	6
AYBL13#68	4.95	0.13	0.321	0.006	0.1117	0.0024	1807	22	1794	29	1819	39	0.540773	0.992754	1819	19.5
AYBL13#69	10.11	0.24	0.4563	0.0091	0.1601	0.0028	2441	22	2421	40	2464	26	0.978723	0.991739	2464	13
AYBL13#70	10.33	0.3	0.4543	0.0094	0.1642	0.0034	2460	27	2412	42	2492	34	0.526804	0.9801	2492	17
AYBL13#71	0.59	0.025	0.0766	0.0016	0.0559	0.0025	469	16	475.5	9.5	410	100	0.496479	0.98633	475.5	4.75
AYBL13#72	1.375	0.091	0.1482	0.0036	0.0674	0.0045	867	39	890	20	760	140	0.461617	0.974157	890	10
AYBL13#73	2.03	0.48	0.213	0.024	0.076	0.018	910	190	1220	120	430	480	46.3807	0.745902
AYBL13#74	0.557	0.027	0.0745	0.0016	0.0545	0.0028	447	18	463	9.4	370	110	0.682927	0.965443	463	4.7
AYBL13#75	10.94	0.34	0.476	0.012	0.1667	0.0042	2511	29	2507	53	2514	43	0.493976	0.998404	2514	21.5
AYBL13#76	0.556	0.019	0.073	0.0013	0.0557	0.0019	448	12	454.1	7.8	415	75	0.864748	0.986567	454.1	3.9
AYBL13#77	4.85	0.13	0.3188	0.0074	0.1107	0.0028	1790	22	1782	36	1799	47	0.733865	0.995511	1799	23.5
AYBL13#78	1.997	0.062	0.1887	0.0034	0.0767	0.0019	1111	21	1114	18	1111	47	0.595628	0.997307	1114	9
AYBL13#79	1.173	0.081	0.1303	0.004	0.0658	0.0046	785	40	789	23	730	150	1.52436	0.99493	789	11.5
AYBL13#80	20.32	0.63	0.626	0.019	0.2363	0.0063	3100	30	3128	74	3085	43	0.414966	0.991049	3085	21.5
AYBL13#81	0.553	0.03	0.0726	0.0015	0.0554	0.0029	444	19	451.8	8.7	380	110	0.922131	0.982736	451.8	4.35
AYBL13#82	0.521	0.029	0.071	0.0014	0.0535	0.0031	423	19	441.8	8.5	300	120	0.678832	0.957447	441.8	4.25
AYBL13#83	1.946	0.05	0.1919	0.0032	0.0736	0.002	1095	17	1132	17	1016	55	0.698851	0.967314	1132	8.5
AYBL13#84	0.541	0.032	0.0701	0.0016	0.0554	0.003	440	19	436.6	9.8	400	120	1.30625	0.992213	436.6	4.9
AYBL13#85	0.96	0.023	0.1124	0.0018	0.062	0.0013	682	12	687	10	663	46	0.659119	0.992722	687	5
AYBL13#86	7.65	0.12	0.4061	0.0051	0.1368	0.0018	2190	14	2197	24	2183	23	0.859433	0.996814	2183	11.5
AYBL13#87	1.145	0.082	0.122	0.0034	0.0686	0.0051	764	39	741	19	780	160	1.65706	0.968961	741	9.5
AYBL13#88	0.589	0.024	0.0765	0.0012	0.0563	0.0023	468	15	475.3	7	429	92	0.792531	0.984641	475.3	3.5
AYBL13#89	0.575	0.036	0.0734	0.0022	0.0572	0.0033	457	23	457	13	440	120	0.743119	1	457	6.5
AYBL13#90	0.671	0.023	0.0772	0.0014	0.0638	0.0025	520	14	479	8.2	701	84	0.580336	0.914405	479	4.1
AYBL13#91	0.632	0.02	0.0551	0.0017	0.0847	0.0021	496	13	346	10	1295	49	0.244379	0.566474
AYBL13#92	2.082	0.073	0.1982	0.0047	0.0775	0.0027	1139	24	1165	25	1112	71	0.636634	0.977682	1165	12.5
AYBL13#93	1.951	0.071	0.1838	0.0035	0.0778	0.0026	1094	25	1087	19	1119	68	0.00240437	0.99356	1087	9.5
AYBL13#94	3.29	0.11	0.2631	0.0061	0.093	0.0032	1473	25	1505	31	1467	65	0.692708	0.978738	1467	32.5
AYBL13#95	1.604	0.056	0.1652	0.004	0.0715	0.0027	968	22	985	22	939	82	0.58125	0.982741	985	11
AYBL13#96	0.668	0.041	0.0849	0.0021	0.0579	0.0035	514	25	525	13	460	130	0.711348	0.979048	525	6.5
AYBL13#97	3.717	0.076	0.2903	0.0039	0.095	0.0017	1573	16	1643	19	1528	37	0.565476	0.957395	1528	18.5
AYBL13#98	13.3	0.47	0.53	0.015	0.1866	0.006	2693	34	2736	61	2697	53	0.438073	0.984284	2697	26.5
AYBL13#99	0.543	0.027	0.0733	0.0016	0.0554	0.0029	438	18	455.7	9.8	380	120	1.02823	0.961159	455.7	4.9
Sample name: KZLT1601			Jurassic Sandstone (Kangsu Fm.)			GPS:	38°30′13″N	76°02′06″E
KZLT1601#01	0.512856	0.0225818	0.0671491	0.00174222	0.0551717	0.00215741	420.368	15.167	418.957	10.5341	420.42	85.175	0.430512	0.996632	418.957	5.26705
KZLT1601#02	5.04023	0.157669	0.324587	0.00690349	0.112408	0.00328264	1826.11	26.6208	1812.09	33.6544	1838.58	52.17	0.882924	0.992265	1838.58	26.085
KZLT1601#03	1.23251	0.0560422	0.132761	0.00609596	0.0659595	0.00324295	815.483	25.513	803.596	34.7023	805.555	77.78	0.782904	0.985207	803.596	17.3511
KZLT1601#04	1.25924	0.0363715	0.136482	0.00309773	0.0667034	0.00155587	827.565	16.3854	824.738	17.5937	827.775	48.145	0.295174	0.996573	824.738	8.79684
KZLT1601#05	5.33339	0.160617	0.334434	0.00718422	0.115399	0.00307231	1874.23	25.8764	1859.84	34.7638	1887.04	48.145	0.397263	0.992262	1887.04	24.0725
KZLT1601#06	2.69595	0.102222	0.229337	0.00683276	0.084979	0.00237377	1327.35	28.1413	1331.03	35.8585	1316.66	54.625	0.427731	0.997236	1316.66	27.3125
KZLT1601#07	1.27622	0.0389915	0.135796	0.00325475	0.0680103	0.00175417	835.167	17.4305	820.845	18.4942	877.775	51.855	0.703334	0.982552	820.845	9.2471
KZLT1601#08	0.604597	0.0385301	0.0719238	0.00194205	0.0609884	0.00387743	480.147	24.3905	447.736	11.6893	638.905	159.235	0.530942	0.927611	447.736	5.84464
KZLT1601#09	6.05195	0.285039	0.333756	0.0164877	0.129658	0.00742426	1983.35	41.1303	1856.56	79.7149	2094.45	78.09	1.12634	0.931708	2094.45	39.045
KZLT1601#10	1.20884	0.034881	0.134206	0.00277644	0.0649128	0.00147296	804.658	16.0718	811.814	15.8046	772.225	48.145	0.40936	0.991185	811.814	7.90231
KZLT1601#11	0.697403	0.0428425	0.0706273	0.00146449	0.0714987	0.00435016	537.238	25.6387	439.934	8.83071	972.225	211.11	1.32864	0.77882
KZLT1601#12	0.550946	0.0187746	0.070846	0.00175657	0.0562113	0.00162581	445.616	12.3064	441.25	10.5851	461.155	72.215	1.49017	0.990106	441.25	5.29257
KZLT1601#13	10.8705	0.277584	0.470863	0.0101964	0.166376	0.00325059	2512.11	23.9887	2487.34	44.769	2521.3	33.64	0.414673	0.990042	2521.3	16.82
KZLT1601#14	5.5592	0.130772	0.340666	0.00714776	0.117893	0.00246935	1909.8	20.4098	1889.87	34.4296	1924.38	37.045	0.317239	0.989455	1924.38	18.5225
KZLT1601#15	1.82848	0.0958866	0.178258	0.0121749	0.0779625	0.00626644	1055.73	34.4518	1057.45	66.6203	1146.3	168.51	0.118956	0.998377	1146.3	84.255
KZLT1601#16	0.554144	0.0191242	0.070476	0.0016229	0.0566332	0.00167639	447.707	12.5094	439.023	9.78464	475.97	66.66	0.597303	0.980218	439.023	4.89232
KZLT1601#17	1.55043	0.0604513	0.149971	0.00373305	0.0743625	0.00237845	950.663	24.1017	900.801	20.949	1051.55	62.035	0.662918	0.944647	900.801	10.4745
KZLT1601#18	1.40842	0.0385948	0.145446	0.00318685	0.0698021	0.00180362	892.49	16.3167	875.387	17.96	924.07	54.005	0.6438	0.980462	875.387	8.98001
KZLT1601#19	0.559681	0.0176389	0.0719865	0.00162081	0.0559333	0.00176768	451.319	11.4997	448.113	9.75879	450.045	53.7	0.791095	0.992845	448.113	4.8794
KZLT1601#20	1.51429	0.0675686	0.151961	0.00471073	0.0716724	0.00272823	936.175	27.3169	911.947	26.3798	975.93	48.155	0.263381	0.973433	911.947	13.1899
KZLT1601#21	10.6094	0.249539	0.461233	0.00936366	0.165847	0.00318256	2489.53	22.0862	2445	41.3933	2516.36	32.715	1.25054	0.981785	2516.36	16.3575
KZLT1601#22	0.634795	0.0211154	0.0800741	0.00187341	0.0572899	0.00170167	499.078	13.1325	496.565	11.1943	501.89	122.205	0.878092	0.994939	496.565	5.59716
KZLT1601#23	1.27162	0.150892	0.133895	0.0130025	0.0638042	0.00710767	833.114	67.4562	810.049	73.9269	744.45	237.015	0.0892443	0.971527	810.049	36.9635
KZLT1601#24	12.3005	0.380196	0.495164	0.0121579	0.17897	0.00392999	2627.61	29.2439	2592.98	52.4936	2643.52	36.43	0.738916	0.986643	2643.52	18.215
KZLT1601#25	1.55309	0.041378	0.155772	0.00327606	0.0721206	0.00167173	951.725	16.5071	933.238	18.3003	990.74	47.225	0.178323	0.980191	933.238	9.15014
KZLT1601#26	0.530079	0.023147	0.0665251	0.00205634	0.057464	0.00189674	431.862	15.3719	415.186	12.4372	509.3	77.77	0.696063	0.959835	415.186	6.21862
KZLT1601#27	0.572922	0.0158123	0.0726171	0.0017633	0.0572405	0.00148305	459.902	10.2266	451.904	10.6087	501.89	55.55	0.228629	0.9823	451.904	5.30434
KZLT1601#28	0.566336	0.0309789	0.0647611	0.00227474	0.0634655	0.00355545	455.642	20.0917	404.515	13.7789	724.08	138.59	0.600239	0.87361
KZLT1601#29	0.579834	0.0216758	0.0739105	0.00228063	0.0569929	0.00267734	464.355	13.9457	459.672	13.699	500.04	103.695	1.2835	0.989813	459.672	6.84951
KZLT1601#30	5.07682	0.139877	0.330571	0.00672211	0.11106	0.00259493	1832.24	23.5047	1841.15	32.6283	1816.97	43.52	0.369294	0.995161	1816.97	21.76
KZLT1601#31	24.3015	0.569156	0.648492	0.0136453	0.271367	0.00512391	3280.57	23.2726	3222.31	53.4734	3313.89	29.625	0.374578	0.981921	3313.89	14.8125
KZLT1601#32	3.24456	0.0930698	0.253599	0.00609251	0.092631	0.00200437	1467.88	22.3535	1457.01	31.3692	1480.55	40.735	0.596194	0.99254	1480.55	20.3675
KZLT1601#33	8.74703	0.211469	0.430066	0.00995006	0.14732	0.00265672	2311.99	22.2527	2306.01	44.9217	2316.67	31.8	0.340947	0.997409	2316.67	15.9
KZLT1601#34	0.67356	0.0175072	0.0842686	0.00204638	0.0579775	0.0011972	522.874	10.6458	521.551	12.1796	527.815	44.44	0.558893	0.997463	521.551	6.0898
KZLT1601#35	1.25292	0.0440203	0.13447	0.00363265	0.0675861	0.00207412	824.72	19.8715	813.314	20.6606	857.4	53.705	1.00105	0.985977	813.314	10.3303
KZLT1601#36	1.38516	0.0443234	0.148202	0.00450123	0.0678177	0.00166578	882.637	18.907	890.877	25.2898	864.81	49.075	0.32592	0.990751	890.877	12.6449
KZLT1601#37	0.606571	0.0222462	0.0779533	0.00206343	0.0565855	0.00191451	481.396	14.0752	483.895	12.3509	475.97	83.325	0.284588	0.994836	483.895	6.17544
KZLT1601#38	0.741127	0.0276744	0.0894635	0.00235207	0.0598119	0.00174058	563.063	16.1572	552.363	13.9301	598.17	62.945	1.10166	0.980629	552.363	6.96505
KZLT1601#39	4.75899	0.141232	0.315824	0.00949644	0.109297	0.00542384	1777.69	25.0181	1769.3	46.5637	1787.97	89.82	0.779562	0.995257	1787.97	44.91
KZLT1601#40	1.59318	0.178883	0.144987	0.0128636	0.0787417	0.00397836	967.542	70.0556	872.799	72.4296	1165.74	102.165	1.54192	0.891449
KZLT1601#41	4.6154	0.269025	0.262871	0.0128285	0.120144	0.00714516	1752.06	48.7036	1504.52	65.5042	1958.34	106.485	0.396681	0.835468
KZLT1601#42	0.623442	0.0235446	0.0803164	0.00236807	0.0561243	0.0016729	492.002	14.7412	498.011	14.1409	457.45	66.66	0.292627	0.987934	498.011	7.07044
KZLT1601#43	1.32462	0.0374015	0.139208	0.00348964	0.0688601	0.00159607	856.532	16.3783	840.183	19.7676	894.445	45.995	0.472721	0.980541	840.183	9.8838
KZLT1601#44	0.587087	0.0179903	0.073937	0.00181077	0.0573858	0.00139856	469.006	11.5274	459.831	10.8806	505.595	51.85	0.883158	0.980048	459.831	5.44032
KZLT1601#45	5.40396	0.172975	0.30078	0.00820233	0.129444	0.00260687	1885.48	27.5458	1695.18	40.6904	2090.43	33.65	0.533028	0.887737
KZLT1601#46	4.80235	0.14135	0.315509	0.00695518	0.110194	0.00281471	1785.31	24.8544	1767.76	34.136	1802.78	36.72	0.834553	0.990071	1802.78	18.36
KZLT1601#47	0.552084	0.0148783	0.0703922	0.00158594	0.0568724	0.00131386	446.361	9.75241	438.518	9.56303	487.08	61.105	0.820548	0.982116	438.518	4.78152
KZLT1601#48	1.44008	0.107464	0.14982	0.0151574	0.072212	0.00692349	905.755	44.7356	899.957	84.9848	991.665	59.255	0.526165	0.993558	899.957	42.4924
KZLT1601#49	0.673229	0.0289388	0.0731221	0.00247128	0.0671308	0.0028406	522.674	17.5756	454.938	14.8535	842.59	85.18	0.738152	0.85111
KZLT1601#50	0.517131	0.0234989	0.0666496	0.00200952	0.056724	0.00255561	423.233	15.7379	415.939	12.1531	479.67	99.99	0.491801	0.982463	415.939	6.07654
KZLT1601#51	11.8331	0.368272	0.488141	0.0138998	0.175724	0.00391201	2591.29	29.3508	2562.63	60.2755	2612.65	37.035	0.714683	0.988817	2612.65	18.5175
KZLT1601#52	1.17869	0.0334775	0.130592	0.00288799	0.0654816	0.00172751	790.701	15.6393	791.241	16.4889	790.74	55.55	0.92068	0.999318	791.241	8.24445
KZLT1601#53	1.23826	0.0462205	0.133958	0.00397201	0.0668429	0.00184975	818.094	20.9973	810.406	22.5974	833.02	55.55	0.39765	0.990513	810.406	11.2987
KZLT1601#54	0.546727	0.0149739	0.0713405	0.00175848	0.0555256	0.00116384	442.85	9.84835	444.227	10.5919	435.23	48.14	0.488116	0.996901	444.227	5.29595
KZLT1601#55	0.494719	0.0280318	0.0640929	0.00266573	0.0558084	0.00251249	408.121	19.0504	400.469	16.1551	455.6	99.99	0.709965	0.98089	400.469	8.07756
KZLT1601#56	1.66044	0.0671786	0.167832	0.00428804	0.0717821	0.00253831	993.542	25.675	1000.16	23.6945	988.89	74.075	1.32623	0.993388	988.89	37.0375
KZLT1601#57	0.470219	0.0250083	0.0589615	0.00205782	0.0577731	0.00275442	391.34	17.2798	369.307	12.5333	520.41	107.4	1.03627	0.940338	369.307	6.26664
KZLT1601#58	1.70028	0.0487453	0.170544	0.00376488	0.072221	0.00180009	1008.64	18.3809	1015.11	20.7629	992.28	50.315	0.464474	0.993624	992.28	25.1575
KZLT1601#59	14.5375	0.587852	0.531247	0.0200465	0.197508	0.00880086	2785.46	38.6028	2746.7	84.446	2805.86	72.835	1.00364	0.985891	2805.86	36.4175
KZLT1601#60	1.74331	0.109456	0.173101	0.00891314	0.0724607	0.00363515	1024.69	40.537	1029.17	48.992	998.15	103.715	0.649635	0.995643	998.15	51.8575
KZLT1601#61	0.622542	0.0195864	0.0779059	0.00156264	0.057953	0.00163921	491.439	12.2753	483.611	9.35994	527.815	68.51	0.73315	0.983813	483.611	4.67997
KZLT1601#62	1.62837	0.0409522	0.166497	0.00333408	0.0708537	0.00147311	981.23	15.8767	992.781	18.4563	953.7	44.45	0.559919	0.988365	992.781	9.22816
KZLT1601#63	11.3326	0.465343	0.481376	0.0234728	0.171841	0.0101768	2550.89	38.4701	2533.26	102.182	2575.62	98.77	0.363489	0.993039	2575.62	49.385
KZLT1601#64	1.5777	0.0406389	0.159124	0.00305624	0.0718371	0.00160712	961.464	16.0614	951.909	17.0282	981.17	38.89	1.2525	0.989961	951.909	8.51409
KZLT1601#65	1.21529	0.0385499	0.130814	0.00312334	0.0671419	0.00161438	807.619	17.7035	792.508	17.8258	842.59	61.11	0.625175	0.980932	792.508	8.91288
KZLT1601#66	6.91546	0.212214	0.383501	0.0109388	0.131798	0.0041041	2100.64	27.372	2092.62	51.0192	2121.91	55.24	0.799544	0.996165	2121.91	27.62
KZLT1601#67	0.624477	0.0150064	0.0795042	0.00154619	0.05693	0.00112308	492.65	9.40366	493.162	9.24862	487.08	31.48	0.23651	0.99896	493.162	4.62431
KZLT1601#68	0.5936	0.0212852	0.0761181	0.00196338	0.0566974	0.00190039	473.164	13.5774	472.91	11.7726	479.67	74.065	0.409183	0.999462	472.91	5.88631
KZLT1601#69	3.81553	0.103273	0.27918	0.00624891	0.098997	0.00201483	1596.03	21.8837	1587.23	31.5379	1605.56	37.34	0.490244	0.994458	1605.56	18.67
KZLT1601#70	0.603859	0.0176218	0.0724107	0.00160383	0.0604851	0.00150484	479.68	11.1752	450.663	9.65315	620.39	64.8	0.49044	0.935614	450.663	4.82657
KZLT1601#71	2.33825	0.0731366	0.206191	0.00453019	0.0822054	0.00222111	1223.99	22.3079	1208.49	24.2465	1249.99	43.52	1.2676	0.987174	1249.99	21.76
KZLT1601#72	1.24096	0.035465	0.13279	0.00302859	0.0675594	0.00131012	819.319	16.1078	803.764	17.2568	855.24	40.745	0.412846	0.980647	803.764	8.62838
KZLT1601#73	1.08533	0.157635	0.115462	0.0142165	0.0661501	0.00354947	746.234	76.7618	704.39	82.1626	812.96	122.21	0.117698	0.940595	704.39	41.0813
KZLT1601#74	1.3987	0.0611024	0.146134	0.00469075	0.0684639	0.00309787	888.386	25.8932	879.257	26.4001	883.33	92.595	0.438553	0.989618	879.257	13.2001
KZLT1601#75	0.534496	0.0167938	0.0684862	0.00147624	0.0564478	0.00139478	434.789	11.1283	427.029	8.91842	477.82	55.55	0.489267	0.981828	427.029	4.45921
KZLT1601#76	0.528127	0.0161939	0.0682154	0.00166367	0.0560981	0.00128186	430.566	10.7762	425.395	10.0503	457.45	48.14	0.710404	0.987843	425.395	5.02517
KZLT1601#77	2.45986	0.253872	0.128873	0.00301113	0.133334	0.00875418	1260.32	74.5248	781.433	17.2157	2142.28	114.815	0.586714	0.387165
KZLT1601#78	1.42557	0.0869061	0.133741	0.0110302	0.0739066	0.00384899	899.695	36.4009	809.175	62.7233	1038.89	39.82	0.689174	0.888132
KZLT1601#79	1.20658	0.0357427	0.131402	0.00311172	0.0664425	0.00133256	803.617	16.4837	795.861	17.7505	820.37	44.44	0.683964	0.990255	795.861	8.87527
KZLT1601#80	1.17451	0.0532436	0.126628	0.00377426	0.0661626	0.00266545	788.755	24.885	768.602	21.6118	812.96	85.18	1.03666	0.973779	768.602	10.8059
KZLT1601#81	6.44592	0.198334	0.369213	0.0094664	0.126878	0.00290765	2038.55	27.1881	2025.7	44.6226	2055.24	41.05	0.710203	0.993655	2055.24	20.525
KZLT1601#82	0.564464	0.020718	0.0731302	0.00254014	0.0562607	0.00146278	454.428	13.4608	454.986	15.2668	461.155	64.81	0.871365	0.998772	454.986	7.63341
KZLT1601#83	1.67778	0.0483296	0.165802	0.00402538	0.073368	0.00180352	1000.14	18.3764	988.942	22.2843	1033.34	51.855	0.372493	0.988676	988.942	11.1422
KZLT1601#84	6.63732	0.15371	0.334937	0.0070767	0.143362	0.00336547	2064.32	20.6277	1862.26	34.2325	2268.21	40.74	0.423292	0.8915
KZLT1601#85	1.41339	0.038067	0.14527	0.00383466	0.0701198	0.00168474	894.584	16.062	874.394	21.6049	931.48	59.565	0.0985876	0.976909	874.394	10.8025
KZLT1601#86	0.510213	0.0214875	0.0643025	0.0019777	0.0570238	0.00242387	418.592	14.4582	401.738	11.9867	500.04	83.325	0.410657	0.958047	401.738	5.99334
KZLT1601#87	8.08277	3.21353	0.422114	0.204796	0.106399	0.0120841	2240.32	359.26	2270.07	928.342	1738.88	207.72	0.28933	0.986896
KZLT1601#88	1.2899	0.0370434	0.135725	0.0043538	0.0678631	0.00233249	841.252	16.4655	820.442	24.7282	864.81	71.915	1.17609	0.974637	820.442	12.3641
KZLT1601#89	2.86742	0.0829137	0.234918	0.00780641	0.0872261	0.00298863	1373.39	21.8488	1360.22	40.7768	1365.74	65.745	0.426383	0.990317	1365.74	32.8725
KZLT1601#90	1.2538	0.0374263	0.135527	0.00431733	0.0664673	0.00216665	825.119	16.8986	819.32	24.5256	820.37	66.66	0.586181	0.992922	819.32	12.2628
KZLT1601#91	0.489712	0.0212097	0.0640648	0.00207364	0.054953	0.00252113	404.714	14.4669	400.298	12.5701	409.31	94.435	0.991512	0.988968	400.298	6.28507
KZLT1601#92	1.19062	0.0315705	0.13063	0.00348978	0.0656846	0.00157114	796.247	14.6734	791.459	19.9157	798.15	48.145	0.525794	0.99395	791.459	9.95786
KZLT1601#93	0.638043	0.0455322	0.0811915	0.00468646	0.0567421	0.00499048	501.094	28.2325	503.231	27.9475	483.375	187.02	0.725288	0.995754	503.231	13.9738
KZLT1601#94	1.2003	0.0351169	0.13153	0.0028569	0.0661092	0.00176835	800.725	16.2421	796.587	16.2987	809.26	55.55	0.57973	0.994806	796.587	8.14935
KZLT1601#95	1.1138	0.066804	0.123863	0.00667202	0.0650153	0.00364687	760.003	32.1065	752.762	38.279	775.93	118.51	0.781852	0.990381	752.762	19.1395
KZLT1601#96	0.550808	0.0234783	0.0721007	0.00425375	0.056114	0.00316255	445.526	15.3842	448.799	25.5819	457.45	122.21	0.971522	0.992706	448.799	12.7909
KZLT1601#97	1.15648	0.0393409	0.128379	0.00284777	0.0654344	0.00200231	780.301	18.5541	778.613	16.291	787.04	53.7	0.774237	0.997832	778.613	8.14549
KZLT1601#98	0.511868	0.0148943	0.0653423	0.00134095	0.0568312	0.0014566	419.704	10.0194	408.033	8.1261	483.375	64.81	0.94054	0.971396	408.033	4.06305
KZLT1601#99	0.695514	0.0440793	0.0752218	0.00160259	0.0670227	0.00377873	536.108	26.4076	467.539	9.62145	838.885	107.1	0.403016	0.853341
KZLT1601#100	3.56079	0.103316	0.267639	0.00623347	0.0962962	0.00198864	1540.84	23.0968	1528.81	31.7425	1553.71	28.08	0.760663	0.992129	1553.71	14.04
Sample name: KZLT1602			Jurassic Sandstone (Yangye Fm.)			GPS:	38°33′54″N	76°05′29″E
KZLT1602#01	5.51805	0.158895	0.347064	0.00832801	0.115059	0.00252999	1903.41	24.8877	1920.56	39.9079	1880.55	41.04	0.282592	0.991069	1880.55	20.52
KZLT1602#02	4.04268	0.10227	0.291175	0.00625247	0.100439	0.00193267	1642.83	20.7138	1647.4	31.2672	1632.4	35.805	0.441206	0.997226	1632.4	17.9025
KZLT1602#03	1.3274	0.0629162	0.141493	0.00374367	0.0683521	0.0032317	857.748	27.4734	853.098	21.1619	879.63	87.345	1.088	0.994549	853.098	10.5809
KZLT1602#04	0.518345	0.0162523	0.0660759	0.00160221	0.0568804	0.00163265	424.045	10.8839	412.471	9.6986	487.08	55.55	1.18178	0.971938	412.471	4.8493
KZLT1602#05	0.586033	0.0178331	0.0746074	0.00179658	0.0569477	0.0014368	468.331	11.4345	463.854	10.789	500.04	46.29	0.621804	0.990349	463.854	5.39452
KZLT1602#06	0.538477	0.021569	0.062184	0.00169425	0.0626999	0.00237245	437.42	14.2478	388.894	10.291	698.16	295.695	0.573157	0.875221
KZLT1602#07	18.3769	0.448593	0.586571	0.0122326	0.226634	0.00460773	3009.68	23.8608	2975.5	49.8064	3028.7	30.245	0.267533	0.988515	3028.7	15.1225
KZLT1602#08	0.603146	0.0218185	0.0772135	0.00207803	0.0564972	0.00151855	479.228	13.8345	479.469	12.4464	472.265	59.25	0.255725	0.999499	479.469	6.22322
KZLT1602#09	1.18526	0.0326877	0.127658	0.00313612	0.0671131	0.00143211	793.76	15.2267	774.492	17.9476	842.59	86.74	0.341736	0.975122	774.492	8.97379
KZLT1602#10	9.70216	0.229174	0.426833	0.00895095	0.164249	0.00342676	2406.91	21.9882	2291.43	40.5159	2499.69	29.005	0.271947	0.949602	2499.69	14.5025
KZLT1602#11	1.75141	0.0459267	0.170101	0.00378703	0.0744304	0.00160353	1027.68	17.0063	1012.67	20.8925	1053.71	40.74	0.148767	0.985172	1053.71	20.37
KZLT1602#12	1.24573	0.0330071	0.134352	0.00305334	0.0669782	0.00142186	821.478	14.9656	812.642	17.374	838.885	44.44	0.534603	0.989128	812.642	8.687
KZLT1602#13	1.25338	0.0374128	0.135792	0.00351519	0.0666803	0.00143897	824.928	16.8957	820.824	19.9708	827.775	44.44	0.413479	0.995001	820.824	9.98542
KZLT1602#14	2.31997	0.210735	0.206452	0.00631214	0.0795736	0.00424106	1218.42	64.4726	1209.89	33.7528	1187.04	88.88	0.5992	0.992952	1187.04	44.44
KZLT1602#15	5.13925	0.126243	0.324376	0.00674259	0.114455	0.00233189	1842.62	21.0294	1811.07	32.8779	1872.22	34.255	0.42439	0.982578	1872.22	17.1275
KZLT1602#16	6.84588	0.230017	0.374904	0.00863037	0.132193	0.0042686	2091.68	29.9035	2052.44	40.5252	2127.47	44.135	0.604818	0.98088	2127.47	22.0675
KZLT1602#17	10.1554	0.254667	0.455015	0.00977998	0.16114	0.0031687	2449.03	23.4182	2417.51	43.4086	2477.77	32.72	0.976758	0.986961	2477.77	16.36
KZLT1602#18	0.577567	0.023748	0.0737024	0.00186604	0.0566156	0.00196659	462.897	15.2981	458.423	11.2145	475.97	83.325	0.560186	0.990242	458.423	5.60724
KZLT1602#19	1.18027	0.0349156	0.130269	0.00295175	0.0654596	0.00165955	791.44	16.2963	789.398	16.8567	790.74	61.105	0.991679	0.997413	789.398	8.42834
KZLT1602#20	1.66854	0.054755	0.164741	0.00386451	0.073083	0.00185224	996.632	20.8784	983.069	21.415	1016.66	57.41	0.417527	0.986203	983.069	10.7075
KZLT1602#21	8.92227	0.218989	0.399442	0.00836738	0.161323	0.00373356	2330.08	22.6329	2166.47	38.6146	2469.43	30.555	0.394859	0.924479	2469.43	15.2775
KZLT1602#22	1.73916	0.0646057	0.170814	0.00541655	0.0733365	0.00143828	1023.15	23.9891	1016.6	29.8433	1033.34	38.58	0.167682	0.99355	1033.34	19.29
KZLT1602#23	9.48676	0.246899	0.412835	0.0090453	0.16601	0.00369767	2386.27	24.1254	2227.87	41.3415	2517.59	32.72	0.45913	0.928904	2517.59	16.36
KZLT1602#24	9.39063	0.257436	0.425596	0.0106623	0.159509	0.00349759	2376.91	25.3638	2285.83	48.2773	2450.31	39.815	0.207773	0.960155	2450.31	19.9075
KZLT1602#25	1.9093	0.066137	0.176464	0.0044819	0.0780963	0.00210029	1084.34	23.1297	1047.63	24.5845	1150.01	48.155	0.670963	0.964955	1150.01	24.0775
KZLT1602#26	1.15649	0.0319589	0.126717	0.0030244	0.0661113	0.00155672	780.304	15.0852	769.111	17.3238	809.26	44.44	0.566389	0.985447	769.111	8.66189
KZLT1602#27	1.44816	0.0413299	0.149911	0.00347146	0.0698629	0.00162976	909.11	17.1862	900.466	19.4853	924.07	44.44	0.133209	0.990401	900.466	9.74267
KZLT1602#28	0.5689	0.0145458	0.072868	0.00178263	0.0565553	0.00126296	457.303	9.43448	453.411	10.7223	475.97	31.48	0.656607	0.991417	453.411	5.36114
KZLT1602#29	1.64737	0.0416141	0.165666	0.00358598	0.0718551	0.00144167	988.542	16.0174	988.187	19.86	983.335	50	0.682381	0.999641	988.187	9.93002
KZLT1602#30	1.20064	0.0390646	0.131145	0.00321131	0.06625	0.00197443	800.882	18.0574	794.393	18.3214	814.5	50	0.962465	0.991831	794.393	9.16072
KZLT1602#31	0.619358	0.025318	0.0762685	0.00213759	0.0589553	0.00239827	489.445	15.889	473.811	12.8135	564.85	98.145	1.28045	0.967004	473.811	6.40675
KZLT1602#32	0.554517	0.0205839	0.0698051	0.0018744	0.0574268	0.00172197	447.951	13.4589	434.981	11.3045	509.3	66.66	0.726759	0.970182	434.981	5.65223
KZLT1602#33	0.497686	0.0239613	0.065646	0.00186816	0.0552597	0.00263781	410.135	16.2546	409.87	11.3097	433.38	92.585	1.4198	0.999355	409.87	5.65487
KZLT1602#34	0.488411	0.0174856	0.0642693	0.00162717	0.0552376	0.00186965	403.827	11.9412	401.537	9.86553	420.42	70.365	0.967949	0.994298	401.537	4.93276
KZLT1602#35	3.63735	0.104879	0.268083	0.00646271	0.0981153	0.00223888	1557.74	23.0616	1531.06	32.8954	1588.58	40.735	0.988641	0.982573	1588.58	20.3675
KZLT1602#36	0.527622	0.0170909	0.0677156	0.00148553	0.0564443	0.00169136	430.231	11.3751	422.378	8.98057	477.82	72.215	0.623732	0.981409	422.378	4.49029
KZLT1602#37	5.06621	0.154972	0.324657	0.00831905	0.112894	0.00296634	1830.47	26.0589	1812.43	40.5317	1846.61	42.895	0.152705	0.99005	1846.61	21.4475
KZLT1602#38	1.78428	0.0511571	0.172501	0.00364967	0.0747312	0.0019426	1039.74	18.7097	1025.88	20.0965	1061.12	44.45	0.105915	0.986487	1061.12	22.225
KZLT1602#39	4.53993	0.137903	0.293513	0.00651005	0.111534	0.00262738	1738.32	25.3859	1659.06	32.4932	1824.38	40.74	0.469209	0.952227	1824.38	20.37
KZLT1602#40	4.52463	0.127391	0.30845	0.00640534	0.106112	0.00272544	1735.51	23.5321	1733.07	31.613	1800	56.48	0.379786	0.998594	1800	28.24
KZLT1602#41	1.57042	0.0536609	0.160134	0.00373165	0.070779	0.00205301	958.594	21.2375	957.524	20.7611	950.92	68.52	0.337731	0.998883	957.524	10.3805
KZLT1602#42	0.514917	0.020093	0.0682213	0.00155074	0.0545353	0.00200106	421.75	13.4797	425.43	9.36955	394.495	85.175	0.766746	0.99135	425.43	4.68478
KZLT1602#43	1.74392	0.0645854	0.171434	0.00387837	0.0733981	0.00247531	1024.92	23.9403	1020.01	21.3711	1033.34	68.21	0.344004	0.995189	1033.34	34.105
KZLT1602#44	4.6908	0.15379	0.314158	0.00688852	0.107996	0.00334289	1765.6	27.5449	1761.14	33.8441	1765.74	55.56	0.692129	0.997466	1765.74	27.78
KZLT1602#45	1.36727	0.0416866	0.145387	0.00290103	0.067895	0.00186479	874.994	17.92	875.055	16.3548	864.81	57.725	0.133567	0.999931	875.055	8.17739
KZLT1602#46	1.2023	0.0387701	0.125038	0.00334093	0.0694122	0.00179521	801.646	17.9084	759.493	19.161	910.8	127.78	0.374926	0.944499	759.493	9.58048
KZLT1602#47	5.01615	0.166759	0.325421	0.00815314	0.111545	0.00333312	1822.05	28.2539	1816.15	39.7027	1824.99	50.93	0.803297	0.99675	1824.99	25.465
KZLT1602#48	1.62156	0.046828	0.162817	0.0035734	0.0720218	0.00190796	978.594	18.1862	972.414	19.838	987.04	51.85	1.36952	0.993645	972.414	9.919
KZLT1602#49	0.571435	0.0257697	0.0670778	0.00180148	0.0614129	0.00235306	458.942	16.6628	418.526	10.8924	653.72	68.2	1.32141	0.903432	418.526	5.44622
KZLT1602#50	0.552876	0.0319773	0.0656071	0.00345764	0.0608343	0.00256291	446.879	20.9179	409.636	20.9218	635.2	46.29	0.817924	0.909082	409.636	10.4609
KZLT1602#51	0.525348	0.0196052	0.0685866	0.00172216	0.0556356	0.00194563	428.718	13.0636	427.635	10.3994	438.935	77.77	1.22357	0.997467	427.635	5.19972
KZLT1602#52	1.17651	0.0806552	0.117495	0.00458395	0.0730246	0.00539453	789.685	37.6426	716.127	26.4544	1014.5	133.33	2.63053	0.897284	716.127	13.2272
KZLT1602#53	1.00547	0.0434281	0.11289	0.00274707	0.0646007	0.0027162	706.582	22.009	689.512	15.9298	761.115	72.215	1.83816	0.975244	689.512	7.9649
KZLT1602#54	1.0919	0.0283418	0.12009	0.00252468	0.0658646	0.00159511	749.428	13.7945	731.084	14.5516	1200	50.31	0.845486	0.974908	731.084	7.27582
KZLT1602#55	0.528943	0.0201342	0.0665721	0.00168308	0.0577358	0.00221908	431.108	13.3841	415.47	10.1825	520.41	64.805	0.904252	0.962361	415.47	5.09124
KZLT1602#56	1.12596	0.0807329	0.114189	0.00423427	0.0730415	0.00589731	765.826	38.573	697.031	24.51	1016.66	122.21	0.934914	0.901303	697.031	12.255
KZLT1602#57	0.624974	0.0230435	0.0760267	0.00183901	0.0596333	0.00203036	492.96	14.4146	472.363	11.0292	590.77	75.92	0.542111	0.956395	472.363	5.51461
KZLT1602#58	1.3823	0.0391446	0.143958	0.00303598	0.0695172	0.00157941	881.422	16.7272	867.007	17.1339	913.885	44.445	0.369247	0.983374	867.007	8.56696
KZLT1602#59	4.20075	0.126306	0.290093	0.00653856	0.105034	0.00263702	1674.17	24.7646	1642	32.7204	1716.66	44.44	0.482262	0.980408	1716.66	22.22
KZLT1602#60	4.87958	0.122337	0.313749	0.00709708	0.112953	0.00245599	1798.74	21.2683	1759.13	34.8763	1847.22	37.03	0.645796	0.977483	1847.22	18.515
KZLT1602#61	0.588619	0.014541	0.0742401	0.00142776	0.0574557	0.00119017	469.985	9.31602	461.65	8.58237	509.3	44.44	0.113296	0.981945	461.65	4.29119
KZLT1602#62	1.13365	0.0495449	0.124421	0.00308609	0.0661327	0.00262694	769.492	23.6011	755.957	17.7117	810.8	70.375	0.391899	0.982096	755.957	8.85584
KZLT1602#63	1.7291	0.0549589	0.165972	0.00377133	0.0756525	0.00229706	1019.42	20.4948	989.877	20.8783	1087.04	57.09	0.840146	0.97016	989.877	10.4392
KZLT1602#64	0.500334	0.0156277	0.0643468	0.00148661	0.056322	0.001556	411.929	10.5912	402.007	9.0144	464.86	55.55	0.532937	0.975319	402.007	4.5072
KZLT1602#65	0.514753	0.0187059	0.0675471	0.00148934	0.0552363	0.00177367	421.64	12.5522	421.361	9.00495	420.42	70.36	0.916761	0.999336	421.361	4.50247
KZLT1602#66	0.487011	0.0149868	0.064304	0.00130496	0.054837	0.00150505	402.871	10.2481	401.747	7.91593	405.605	59.25	1.82876	0.997202	401.747	3.95796
KZLT1602#67	1.39297	0.0506492	0.142955	0.00331976	0.0706335	0.00256654	885.959	21.5252	861.352	18.7469	946.29	50.005	1.3565	0.971433	861.352	9.37347
KZLT1602#68	11.2537	0.321582	0.464883	0.0118696	0.174849	0.0030955	2544.38	26.871	2461.08	52.3014	2605.55	27.46	0.447923	0.966154	2605.55	13.73
KZLT1602#69	0.505574	0.0147377	0.0659008	0.00136853	0.0556926	0.00157112	415.469	9.95539	411.412	8.28862	438.935	62.955	0.869505	0.990139	411.412	4.14431
KZLT1602#70	4.74674	0.129919	0.306478	0.00681819	0.112085	0.00265678	1775.53	23.0818	1723.35	33.6937	1835.19	41.355	0.849483	0.969721	1835.19	20.6775
KZLT1602#71	0.512992	0.0153637	0.0653432	0.00150623	0.0568669	0.00160378	420.459	10.3266	408.039	9.12489	487.08	55.55	0.668583	0.96956	408.039	4.56245
KZLT1602#72	1.28225	0.104239	0.119197	0.00600386	0.077873	0.00632565	837.854	46.3904	725.938	34.5903	1143.53	73.765	1.62082	0.845832
KZLT1602#73	4.78255	0.147065	0.311349	0.00748167	0.111671	0.00360529	1781.84	25.9373	1747.34	36.8272	1827.78	48.455	0.934134	0.980259	1827.78	24.2275
KZLT1602#74	0.641967	0.0233363	0.0747736	0.00161098	0.062286	0.0022465	503.524	14.4473	464.851	9.67555	683.345	107.405	1.80911	0.916806	464.851	4.83778
KZLT1602#75	1.19282	0.0297834	0.127953	0.00248742	0.0674177	0.00131419	797.269	13.8337	776.18	14.2406	849.995	37.04	0.488729	0.97283	776.18	7.12032
KZLT1602#76	1.43017	0.0345683	0.139488	0.00264904	0.0743007	0.00157286	901.619	14.4954	841.769	15.0139	1050.01	44.45	0.483044	0.928899	841.769	7.50696
KZLT1602#77	1.25353	0.0331202	0.134163	0.00320399	0.0676792	0.0015166	824.995	14.9652	811.568	18.2321	858.94	38.58	0.539723	0.983455	811.568	9.11604
KZLT1602#78	0.514964	0.0187199	0.064095	0.00140681	0.0581877	0.0021355	421.781	12.5599	400.481	8.5336	600.025	49.985	0.178092	0.946814	400.481	4.2668
KZLT1602#79	1.17644	0.0275663	0.12898	0.00280259	0.0660713	0.00131232	789.655	12.9054	782.043	16.0249	809.26	46.29	0.179684	0.990266	782.043	8.01245
KZLT1602#80	1.92373	0.0464677	0.180767	0.00376425	0.0770389	0.00154086	1089.36	16.2056	1071.17	20.5835	1121.91	40.125	0.311157	0.983011	1121.91	20.0625
KZLT1602#81	0.51989	0.0167328	0.0664455	0.00135685	0.0565928	0.00163953	425.078	11.1935	414.705	8.21409	475.97	49.995	0.854789	0.974989	414.705	4.10704
KZLT1602#82	1.21023	0.0415087	0.129575	0.00309368	0.0676329	0.0021837	805.298	19.1006	785.441	17.6758	857.4	120.68	0.833138	0.974718	785.441	8.8379
KZLT1602#83	7.91611	0.208358	0.37946	0.0081272	0.150613	0.00328338	2221.52	23.9198	2073.76	38.0455	2353.71	36.11	0.857721	0.928749	2353.71	18.055
KZLT1602#84	1.11071	0.0271655	0.120036	0.00194563	0.0668618	0.00152437	758.517	13.1089	730.772	11.2259	835.18	48.14	0.360342	0.962033	730.772	5.61297
KZLT1602#85	0.537539	0.0161163	0.0732043	0.00148489	0.052991	0.0013327	436.8	10.6597	455.432	8.93286	327.835	48.14	0.35721	0.959091	455.432	4.46643
KZLT1602#86	0.556568	0.0198468	0.0708502	0.00148359	0.056862	0.00202963	449.29	12.9609	441.276	8.94375	487.08	66.66	0.498258	0.981839	441.276	4.47188
KZLT1602#87	1.20234	0.0379746	0.128913	0.00256237	0.0673131	0.00193426	801.666	17.542	781.663	14.6562	855.55	50.315	0.513295	0.974409	781.663	7.32808
KZLT1602#88	3.05704	0.0798665	0.242203	0.00505342	0.0913363	0.00241463	1422	20.0821	1398.14	26.2682	1453.71	45.67	0.472329	0.982936	1453.71	22.835
KZLT1602#89	0.556145	0.0173585	0.0701427	0.00169412	0.057367	0.00168263	449.014	11.3428	437.015	10.2161	505.595	81.78	0.714811	0.972544	437.015	5.10803
KZLT1602#90	1.2115	0.0404965	0.129705	0.00280387	0.0675348	0.0020473	805.879	18.6257	786.184	16.0222	853.7	58.95	1.62273	0.974948	786.184	8.01109
KZLT1602#91	0.961216	0.077569	0.109482	0.00602499	0.0638141	0.00586876	683.926	40.1707	669.74	35.0144	744.45	213.59	1.06026	0.978818	669.74	17.5072
KZLT1602#92	1.10679	0.0309829	0.125023	0.00252497	0.0641793	0.00166727	756.63	14.9678	759.411	14.4914	746.3	55.55	1.00881	0.996338	759.411	7.24569
KZLT1602#93	0.554209	0.0143561	0.0728472	0.00141032	0.0550326	0.00122879	447.75	9.39878	453.286	8.48832	413.01	51.845	0.462359	0.987787	453.286	4.24416
KZLT1602#94	0.443062	0.0124075	0.0549847	0.0014043	0.0584628	0.00154809	372.409	8.74497	345.053	8.58897	546.33	51.84	0.89001	0.920718	345.053	4.29449
KZLT1602#95	0.518282	0.0178604	0.0684813	0.00156879	0.0548772	0.00174022	424.003	11.9584	427	9.47613	405.605	166.64	0.725457	0.992982	427	4.73807
KZLT1602#96	1.17456	0.0317438	0.130175	0.00265068	0.0653852	0.00154662	788.777	14.8611	788.862	15.1432	787.04	51.845	0.883305	0.999893	788.862	7.5716
KZLT1602#97	0.565514	0.0283799	0.066825	0.00200561	0.0611419	0.00266892	455.109	18.4175	416.999	12.1275	642.61	86.715	0.217718	0.908608	416.999	6.06374
KZLT1602#98	0.525121	0.0162375	0.068353	0.00144663	0.0558262	0.00174953	428.567	10.8262	426.225	8.74108	455.6	66.66	0.945047	0.994506	426.225	4.37054
KZLT1602#99	6.4704	0.16254	0.36546	0.00843759	0.128284	0.00266846	2041.88	22.2664	2008	39.8933	2075.92	33.34	0.749067	0.983128	2075.92	16.67
KZLT1602#100	0.74085	0.122642	0.0841543	0.00479378	0.0630016	0.0115274	562.901	71.5374	520.872	28.5095	709.27	162.97	0.935609	0.91931	520.872	14.2547
