# Supplementary material for: Switching extensional and contractional tectonics in the West Kunlun Mountains during the Jurassic period: responses to the Neo-Tethyan geodynamics along the Eurasian margin
Source: Copernicus journal article supplement (doi:10.5194/se-16-155-2025), 2025-02-21
Supplement: Supplementary file 4 [file Table S2 Trace element of zircon.xlsx]

## Sheet: zircons
Table S2: Trace element of zircons.
	Age		Sc45	Ti49	Y89	Nb93	La139	Ce140	Pr141	Nd146	Sm147	Eu153	Gd157	Tb159	Dy163	Ho165	Er166	Tm169	Yb172	Lu175	Hf178	Ta181	Pb206	Pb207	Pb208	Th232	U238
	Ma	2 σ	ppm	ppm	ppm	ppm	ppm	ppm	ppm	ppm	ppm	ppm	ppm	ppm	ppm	ppm	ppm	ppm	ppm	ppm	ppm	ppm	ppm	ppm	ppm	ppm	ppm
AYBL09#01	405	15	233		660			13.5			2.5	0.44	10.7	4.5	53	21.2	80	22.8	248	47.1	10600	0.96	41.3	2.69	2.86	74	169
AYBL09#02	437	12	182		755	0.6		15.4		0.97	2.35	0.57	18	5	63	24.9	110	23.7	256	40.9	9670	1.23	66.7	4.07	5.21	155	265
AYBL09#03	430.7	8.9	222	11	493		0.019	5.9		0.53	1.19	0.39	11.4	3.85	42.8	17.1	83.2	16.4	167	31.1	8880	0.65	38.4	2.29	2.03	54.1	143
AYBL09#04	173.7	7.4	202		57			0.75			0.33	0.27	3.8	1.36	9.7	1.76	6.8	0.89	12.9	2.25	11200		9.5	0.62	0.32	16.8	91
AYBL09#05	187.1	7.1	124		153			2.35	0.026		2.41	0.41	11.1	2.18	13.6	3.4	13.1	2.74	26.9	5.5	9200	0.051	15.2	0.82	1.21	62.1	125
AYBL09#06	177.3	6.2	162		271			3.4		1.49	8.1	1.31	28.9	5.2	39.5	9.5	22.5	3.76	41.2	8.4	10000	0.049	16.6	0.87	1.23	81	153
AYBL09#07	911	22	125		1013	21.3	0.08	23.1	0.2	1.8	4.1	0.177	26.5	9	103	36.3	156	32.8	259	40	7110	7	85	6.54	7.03	94.1	145
AYBL09#08	181.6	8.6	185		68			0.41			0.11	0.131	3	0.57	9.3	1.26	6.2	1.38	17.2	3.37	10350		11.2	0.62	0.23	10.5	101
AYBL09#09	178	10	141		64			0.63			0.38	0.25	4.3	0.83	11.9	3	10.2	1.25	8.5	1.47	10900		7.8	0.37	0.36	21.6	66
AYBL09#10	172.1	5.4	137	31	263	0.38		0.9		0.14	0.35	0.41	6.5	1.81	24.9	7.6	26.2	4.7	40	6.4	12500	0.41	32.6	1.84	1.56	98	313
AYBL09#11	182	11	135	10	57			0.081		0.09	0.08	0.136	2.01	0.32	4.9	1.8	7.3	1.13	11.4	2.28	9370		8.98	0.6	0.36	8.5	80
AYBL09#12	173.8	8.3	205	25	77			0.22				0.18	0.75	0.41	6	1.98	8.8	2.03	22.9	5.31	11000		8.33	0.429	0.055	2.94	77
AYBL09#13	181.5	6	193		720	3.8		12.9	0.59	9.7	26.3	6.1	101	22.6	130	26.1	63	8.8	72	9.5	10110	0.75	29.3	1.57	6.8	390	257
AYBL09#14	182	5.2	153		594	1.3	0.033	3.87	0.072	0.91	4.5	1.05	26.6	7.8	76	21.5	64.3	10	78	10.4	11800	0.4	49.7	3	4.18	264	439
AYBL09#15	180.8	5.5	155		271			4.32	0.026	0.89	3.22	0.74	18.8	4	40.4	9.2	24.5	4.65	38	4.37	11860	0.3	25.7	1.51	1.27	107	237
AYBL09#16	178.5	8	181	6	83			0.26				0.16	1.44	0.3	6.8	1.94	9	2.77	25.3	6.1	10100		7.57	0.45	0.098	3.6	71.1
AYBL09#17	426	11	214	2	1020	1.7		14.9	0.092	2.2	3.8	1.37	19	8.3	100	37.5	181	37.8	390	70.1	8520	0.79	52.9	3.2	5.13	138	199
AYBL09#18	181.6	7	174		410			3		0.72	5	1.59	28	7.4	59	12.9	35.6	6.3	51.5	9	10090	0.33	14.8	0.89	1.67	94	130
AYBL09#19	192.7	7	164		226			2.59		1.03	3.5	0.71	20.5	5.2	30.7	7.9	20.8	2.66	25.1	4.3	10120	0.26	26.9	1.63	2	124	228
AYBL09#20	173.4	7.9	170		192			0.35			0.59	0.24	3	1.02	19.1	5.6	24.2	4.6	46	9.4	10700	0.17	17.3	1.04	0.29	11.3	151
AYBL09#21	179.7	8.7	112		91			0.55				0.18	2.7	1.31	10.6	3.39	11.9	2.4	25.8	4.92	11800		10.8	0.58	0.41	16.2	103.2
AYBL09#22	179	5.6	159		1150	1.5	0.082	18.8	0.64	14.1	23.7	4.59	100	23.7	184	39.7	115	16.2	125	15	9790	0.84	36.7	2.24	6.1	402	341
AYBL09#23	Pb Loss		173		1000	0.47	510	1100	112	470	68	9	65	10.5	110	33.4	137	31.2	276	52.3	8300	0.24	63.9	6.51	12.5	159	114
AYBL09#24	797	17	307		1810	7.3	5.3	82.2	9.3	37.6	32	11.4	98	25.3	221	69	276	59.1	504	81.7	9630	1.73	326	23.8	47.5	912	635
AYBL09#25	183.2	8.3	280		54							0.073	0.78	0.13	3.7	1.51	6.2	1.83	18.9	5	9920		8.24	0.53	0.059	3.02	73.5
AYBL09#26	179.1	8.3	233	22	147			0.29		0.14	1.37	0.46	8.8	3.7	24.1	5.1	16	2.97	25.2	5.59	10500		9.7	0.506	0.33	17.4	88
AYBL09#27	178.8	6.6	187	36	128			0.59			0.1	0.2	5.3	1.09	17.9	4	14.3	2.5	22.7	4.1	10900	0.086	12.5	0.68	0.42	20	113
AYBL09#28	171	4.2	227		890	14.8	1.9	24.5	1.37	18.3	32.3	7	151	27.1	158	32.3	75	10.6	82	11.7	11490	2.53	79	4.61	11.9	651	746
AYBL09#29	Pb Loss		140	19	619	4	8.7	85	3.66	19.4	7.2	2.68	16	4.81	57.6	20.1	98	22.1	223	39.3	8050	1.03	83.4	7.92	10.7	154	205
AYBL09#30	170.9	5.5	178	35	339			6.4	0.13	4.1	12	1.96	42	9.2	56	12.6	32.6	4.2	38.4	8	10300	0.16	24.3	1.39	3.45	204	228
AYBL09#31	222	10	197		241	2		3.79	0.45	1.45	5.2	0.93	19.4	6	33.7	8.1	27.8	4.22	40.5	6.5	10730	0.5	23.6	1.34	4.37	159	176
AYBL09#32	901	15	178		940			18.5	0.048	1.16	2.6	0.34	17.4	6.7	85	35.6	144	33.8	320	55.7	9310	1.34	196	15	28.5	286	328
AYBL09#33	Pb Loss		157		150	0.42	0.068	1.95		1.3	2.2	0.29	7.6	2.9	19.2	4.5	14.3	3.48	29.6	4.2	11300	0.15	13.6	1.01	1.07	56	131
AYBL09#34	848	15	183		678		0.34	4.4	0.23	2.5	2.33	0.31	9.1	4.84	67.4	24.4	110	22.9	213	42	10470	1.22	193	13.4	9.8	135	352
AYBL09#35	181	7	159	9	133			4.11		0.69	1.13	0.49	7.5	3.06	23.4	3.57	12.1	2.28	15.4	1.41	10800		13.4	0.8	1.36	68	118
AYBL09#36	182.2	7.5	114	4	46.6			0.21				0.18	1.54	0.32	4.2	1.47	5.2	1.36	12.4	2.78	11530		8.86	0.519	0.24	6.6	76.7
