# Supplementary material for: Switching extensional and contractional tectonics in the West Kunlun Mountains during the Jurassic period: responses to the Neo-Tethyan geodynamics along the Eurasian margin
Source: Copernicus journal article supplement (doi:10.5194/se-16-155-2025), 2025-02-21
Supplement: Supplementary file 5 [file Table S3 Whole rock geochemical results.xlsx]

## Sheet: measured results
Table S3: Whole rock geochemical results of Jurassic basalts.
contents	Samplea	AYBL11B	AYBL11C	AYBL11D	AYBL11E	AYBL11F	AYBL11G
SiO2	%	48.3924	48.2881	55.5457	45.7002	48.562	50.968
TiO2	%	3.3379	2.4236	4.7553	2.4549	2.4463	3.2303
Al2O3	%	13.6642	14.3653	12.448	11.0642	14.2746	13.5914
Fe2O3t	%	12.6267	13.4482	12.0111	13.1862	12.7778	13.7316
MnO	%	0.3122	0.1398	0.0334	0.2097	0.1377	0.1794
MgO	%	5.2361	7.1834	5.9692	5.9885	6.9342	4.7848
CaO	%	5.5958	6.1522	0.666	6.2701	6.4976	5.4683
Na2O	%	4.4929	3.3962	1.7311	1.0983	2.9886	3.9153
K2O	%	1.8597	2.1302	3.0679	4.0751	2.6029	2.3726
P2O5	%	0.4698	0.3033	0.2369	0.2818	0.311	0.4546
LOI	%	4.273	2.324	3.555	9.81	2.174	1.513
SUM	%	100.261	100.154	100.02	100.139	99.7067	100.209
Mg#		45.0824	51.3952	49.5919	47.3416	51.7905	40.8212
Total alkali	%	6.3526	5.5264	4.799	5.1734	5.5915	6.2879
Li	ppm	12.4011	17.176	27.3437	12.7907	17.319	11.6245
Be	ppm	2.12501	0.992474	2.22515	1.11377	1.11315	1.82811
Sc	ppm	27.9918	33.3641	40.7632	27.2914	31.5716	27.1815
V	ppm	308.872	303.375	368.292	229.74	297.833	309.442
Cr	ppm	26.1652	73.1849	107.996	75.5752	70.5611	25.3846
Co	ppm	41.5402	46.2819	33.9011	33.7111	41.1907	42.4913
Ni	ppm	27.3684	61.1577	54.1794	42.9428	55.2593	28.2371
Cu	ppm	174.084	37.6165	199.176	44.3925	41.5685	45.1928
Zn	ppm	191.703	127.584	106.121	113.195	111.202	149.561
Ga	ppm	27.4822	21.4453	22.7906	17.4761	20.9136	24.7948
Rb	ppm	20.8071	33.1168	68.5121	41.4562	39.8052	34.046
Sr	ppm	153.787	285.678	42.0098	77.4961	219.966	308.108
Y	ppm	44.0954	29.1981	34.7187	30.3922	29.5893	45.3508
Zr	ppm	315.957	160.986	374.187	187.115	160.328	304.391
Nb	ppm	46.7547	22.4106	69.1666	34.0152	21.6498	45.0113
Sn	ppm	2.75945	1.3675	3.11294	2.06452	1.34727	2.56132
Cs	ppm	0.146918	0.527358	1.00717	1.12534	0.430601	0.191552
Ba	ppm	404.06	680.269	258.713	246.662	790.448	670.95
La	ppm	43.2825	23.8126	36.6483	27.6293	25.0036	44.9957
Ce	ppm	93.7168	51.1736	67.0683	56.0481	50.5941	95.4485
Pr	ppm	11.314	7.02041	8.72922	7.63322	7.00684	11.7327
Nd	ppm	47.9533	28.1479	32.5488	29.183	28.4933	49.2733
Sm	ppm	10.5365	6.6484	7.03853	6.4886	6.6478	11.1891
Eu	ppm	2.82438	2.02635	1.66938	1.75025	2.14414	3.12512
Gd	ppm	10.1566	6.53668	6.66418	6.37126	6.36667	10.087
Tb	ppm	1.61923	1.01529	1.13756	1.01619	1.00213	1.58711
Dy	ppm	9.35731	6.11539	6.82094	6.03164	6.15096	9.27569
Ho	ppm	1.79737	1.16192	1.44126	1.23664	1.20429	1.83263
Er	ppm	4.77676	2.99373	3.85689	3.24449	3.08767	4.89296
Tm	ppm	0.639057	0.402648	0.540904	0.447313	0.411516	0.635524
Yb	ppm	4.39377	2.73696	3.41345	2.98223	2.69022	4.05661
Lu	ppm	0.637602	0.410708	0.465108	0.447118	0.402692	0.62121
Hf	ppm	8.73165	4.6395	9.20416	5.32455	4.60183	8.42725
Ta	ppm	2.94049	1.37779	3.56908	2.02501	1.34107	2.80021
Tl	ppm	0.0636384	0.0910094	0.110525	0.0803037	0.1212	0.0901072
Pb	ppm	6.54629	2.95931	6.70231	4.44432	2.91583	6.11537
Th	ppm	7.09693	2.82253	6.19289	4.56612	2.94187	6.97215
U	ppm	1.60264	0.611021	1.52962	0.879123	0.591316	1.27746
Ti	ppm	20027.4	14541.6	28531.8	14729.4	14677.8	19381.8
Ti/Y		454.183	498.032	821.799	484.643	496.051	427.375
Nb/U		29.1736	36.6772	45.2182	38.6922	36.6129	35.2351
Pb/Nd		0.136514	0.105134	0.205915	0.152291	0.102334	0.124111
La/Nb		0.925736	1.06256	0.529856	0.812263	1.15491	0.999652
Sm/Nd		0.219725	0.236195	0.216245	0.222342	0.233311	0.227083
(La/Yb)N		7.06602	6.24077	7.70125	6.64551	6.66677	7.95624
δEu		0.834684	0.939727	0.745185	0.832216	1.00758	0.899316
δNb		0.904132	0.926464	1.55604	1.02639	0.855538	0.861295

## Sheet: calculated results
contents	Samplea	AYBL11B	AYBL11C	AYBL11D	AYBL11E	AYBL11F	AYBL11G
SiO2	%	48.2666	48.2137	55.5348	45.6368	48.7049	50.8615
TiO2	%	3.32922	2.41987	4.75437	2.45149	2.4535	3.22355
Al2O3	%	13.6287	14.3432	12.4456	11.0488	14.3166	13.563
Fe2O3t	%	12.5939	13.4275	12.0087	13.1679	12.8154	13.7029
MnO	%	0.311388	0.139585	0.0333935	0.209409	0.138105	0.179025
MgO	%	5.22248	7.17233	5.96803	5.98019	6.9546	4.77481
CaO	%	5.58125	6.14272	0.665869	6.2614	6.51671	5.45688
Na2O	%	4.48122	3.39097	1.73076	1.09678	2.99739	3.90712
K2O	%	1.85486	2.12692	3.0673	4.06944	2.61056	2.36764
P2O5	%	0.468578	0.302833	0.236854	0.281409	0.311915	0.453651
LOI	%	4.26189	2.32042	3.5543	9.79638	2.1804	1.50984
SUM	%	100	100	100	100	100	100
Li	ppm	12.4011	17.176	27.3437	12.7907	17.319	11.6245
Be	ppm	2.12501	0.992474	2.22515	1.11377	1.11315	1.82811
Sc	ppm	27.9918	33.3641	40.7632	27.2914	31.5716	27.1815
V	ppm	308.872	303.375	368.292	229.74	297.833	309.442
Cr	ppm	26.1652	73.1849	107.996	75.5752	70.5611	25.3846
Co	ppm	41.5402	46.2819	33.9011	33.7111	41.1907	42.4913
Ni	ppm	27.3684	61.1577	54.1794	42.9428	55.2593	28.2371
Cu	ppm	174.084	37.6165	199.176	44.3925	41.5685	45.1928
Zn	ppm	191.703	127.584	106.121	113.195	111.202	149.561
Ga	ppm	27.4822	21.4453	22.7906	17.4761	20.9136	24.7948
Rb	ppm	20.8071	33.1168	68.5121	41.4562	39.8052	34.046
Sr	ppm	153.787	285.678	42.0098	77.4961	219.966	308.108
Y	ppm	44.0954	29.1981	34.7187	30.3922	29.5893	45.3508
Zr	ppm	315.957	160.986	374.187	187.115	160.328	304.391
Nb	ppm	46.7547	22.4106	69.1666	34.0152	21.6498	45.0113
Sn	ppm	2.75945	1.3675	3.11294	2.06452	1.34727	2.56132
Cs	ppm	0.146918	0.527358	1.00717	1.12534	0.430601	0.191552
Ba	ppm	404.06	680.269	258.713	246.662	790.448	670.95
La	ppm	43.2825	23.8126	36.6483	27.6293	25.0036	44.9957
Ce	ppm	93.7168	51.1736	67.0683	56.0481	50.5941	95.4485
Pr	ppm	11.314	7.02041	8.72922	7.63322	7.00684	11.7327
Nd	ppm	47.9533	28.1479	32.5488	29.183	28.4933	49.2733
Sm	ppm	10.5365	6.6484	7.03853	6.4886	6.6478	11.1891
Eu	ppm	2.82438	2.02635	1.66938	1.75025	2.14414	3.12512
Gd	ppm	10.1566	6.53668	6.66418	6.37126	6.36667	10.087
Tb	ppm	1.61923	1.01529	1.13756	1.01619	1.00213	1.58711
Dy	ppm	9.35731	6.11539	6.82094	6.03164	6.15096	9.27569
Ho	ppm	1.79737	1.16192	1.44126	1.23664	1.20429	1.83263
Er	ppm	4.77676	2.99373	3.85689	3.24449	3.08767	4.89296
Tm	ppm	0.639057	0.402648	0.540904	0.447313	0.411516	0.635524
Yb	ppm	4.39377	2.73696	3.41345	2.98223	2.69022	4.05661
Lu	ppm	0.637602	0.410708	0.465108	0.447118	0.402692	0.62121
Hf	ppm	8.73165	4.6395	9.20416	5.32455	4.60183	8.42725
Ta	ppm	2.94049	1.37779	3.56908	2.02501	1.34107	2.80021
Tl	ppm	0.0636384	0.0910094	0.110525	0.0803037	0.1212	0.0901072
Pb	ppm	6.54629	2.95931	6.70231	4.44432	2.91583	6.11537
Th	ppm	7.09693	2.82253	6.19289	4.56612	2.94187	6.97215
U	ppm	1.60264	0.611021	1.52962	0.879123	0.591316	1.27746
(La/Yb)N
