# Supplementary figures and images for: Switching extensional and contractional tectonics in the West Kunlun Mountains during the Jurassic period: responses to the Neo-Tethyan geodynamics along the Eurasian margin
Source: Copernicus journal article supplement (doi:10.5194/se-16-155-2025), 2025-02-21

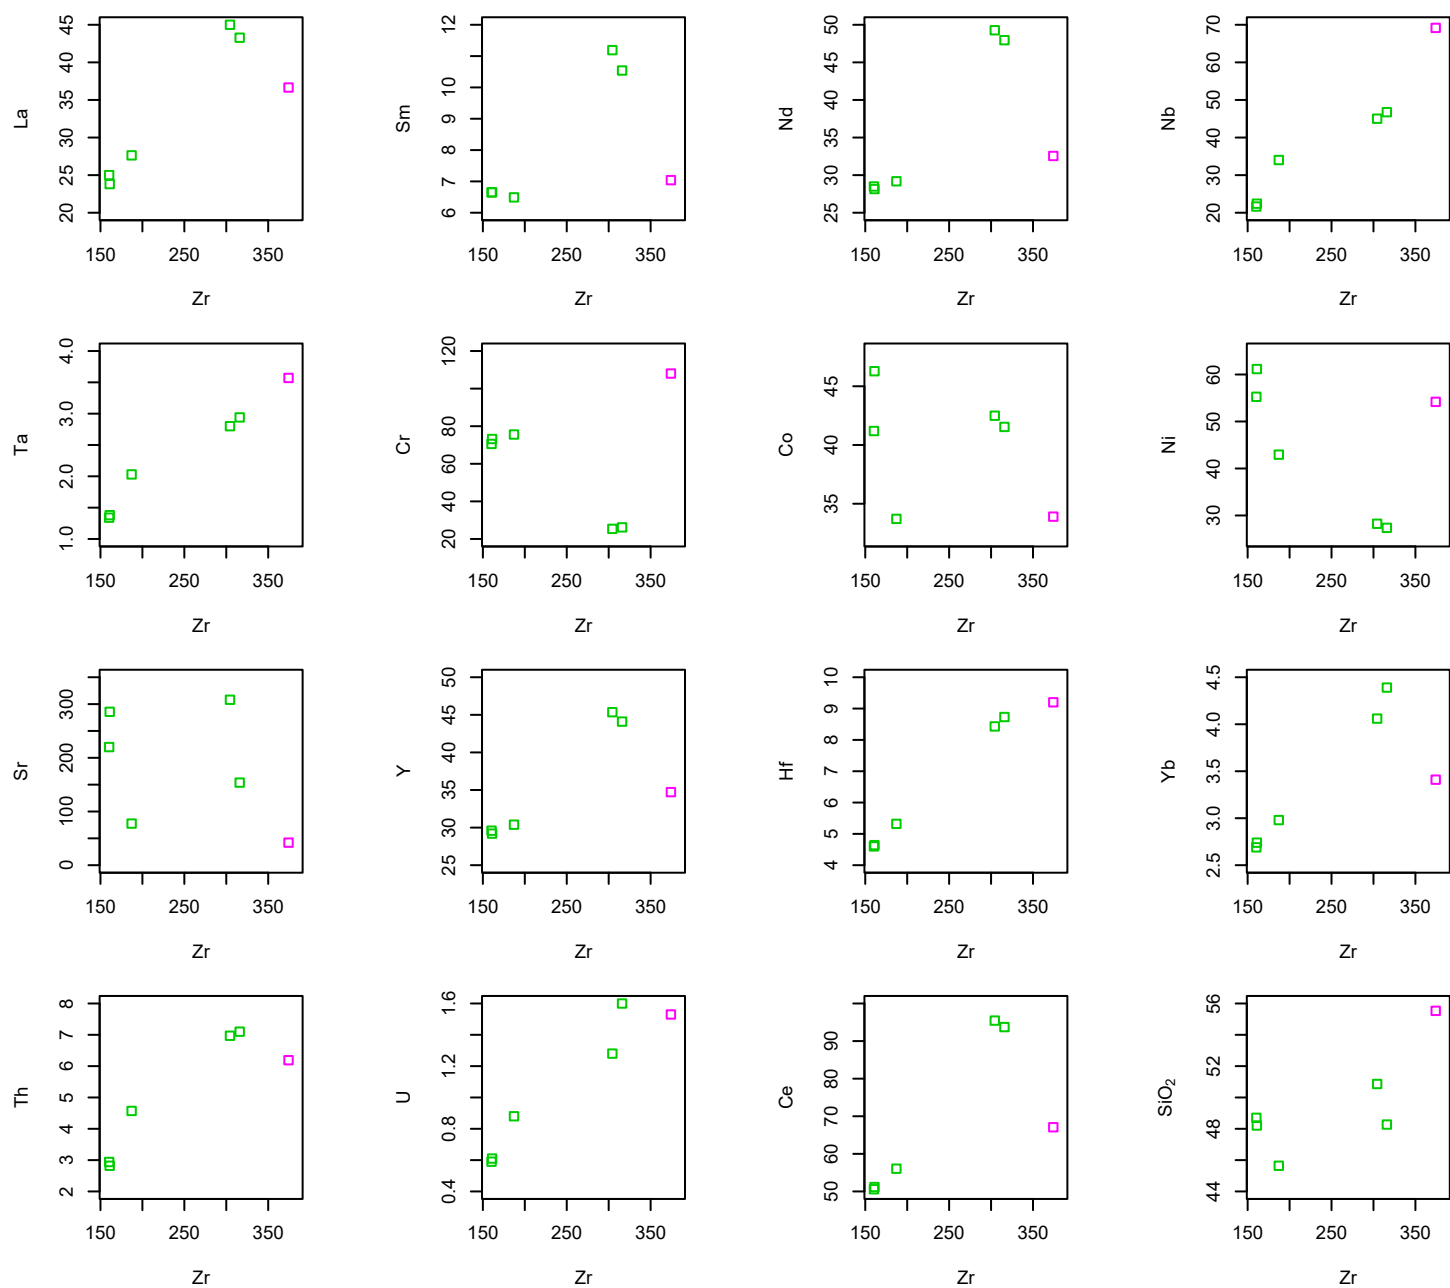

Fig. S1: Correlations between the trace elements of Jurassic basalts.

Supplement: Supplementary file 1 [file se-16-155-2025-supplement.zip]
